# Supplementary material for: Comprehensive Integrative Analysis Reveals the Association of KLF4 with Macrophage Infiltration and Polarization in Lung Cancer Microenvironment
Source: MDPI journal article supplement (doi:10.3390/cells10082091), 2021-08-14
Supplement: s1 [file s1]

## **SUPPLEMENTARY TABLES**

**Table S1.** List of Differentially Expressed Genes (DEGs) in NSCLC

| Gene.symbol | adj.P.Val | logFC        |
|-------------|-----------|--------------|
| FABP4       | 7.06E-81  | -6.025674699 |
| LOC401286   | 1.17E-80  | -7.605771084 |
| SH3GL3      | 2.28E-72  | -3.55573494  |
| LYVE1       | 2.53E-69  | -4.650855422 |
| FMO2        | 6.86E-68  | -3.657638554 |
| ITLN2       | 1.02E-67  | -6.018506024 |
| CLEC1A      | 2.43E-67  | -3.160566265 |
| AGER        | 6.10E-65  | -5.186690763 |
| MMRN1       | 8.09E-65  | -4.135746988 |
| ADH1B       | 8.15E-65  | -4.893542169 |
| PECAM1      | 1.94E-64  | -2.504433735 |
| CLEC3B      | 1.32E-63  | -4.662951807 |
| CAV1        | 2.21E-63  | -4.112295181 |
| FAM107A     | 4.72E-63  | -5.17653012  |
| LDB2        | 2.11E-62  | -2.935891566 |
| RGCC        | 4.06E-61  | -2.769481928 |
| TCF21       | 7.77E-61  | -4.20548996  |
| LGI3        | 2.06E-60  | -3.55446988  |
| JAM2        | 6.84E-60  | -3.048048193 |
| KANK3       | 7.23E-60  | -3.095       |
| SPOCK2      | 3.69E-59  | -3.142542169 |
| S1PR1       | 4.99E-59  | -2.862518072 |
| TEK         | 6.69E-59  | -3.760560241 |
| RHOJ        | 2.89E-58  | -2.887698795 |
| C10orf67    | 3.54E-58  | -3.552915663 |
| ETV4        | 2.49E-57  | 4.165246988  |
| PLAC9       | 4.05E-57  | -3.772301205 |
| SOX17       | 5.06E-57  | -3.214036145 |
| CNRIP1      | 6.87E-57  | -2.918253012 |
| CYYR1       | 8.42E-57  | -2.98539759  |
| SGCG        | 8.66E-57  | -2.969036145 |
| ADAMTS8     | 9.35E-57  | -3.490168675 |
| GHR         | 1.14E-56  | -3.106084337 |
| EMCN        | 2.69E-56  | -3.694506024 |
| MFAP4       | 3.55E-56  | -3.379578313 |
| SCARA5      | 5.47E-56  | -4.226168675 |
| CCM2L       | 6.78E-56  | -3.030771084 |
| DNASE1L3    | 6.78E-56  | -4.666686747 |
| CA4         | 6.78E-56  | -5.49026506  |
| GSTM5       | 5.91E-55  | -2.857       |

|           |          |              |
|-----------|----------|--------------|
| PTPRB     | 3.36E-54 | -3.158433735 |
| CDH5      | 3.51E-54 | -2.845975904 |
| FHL1      | 4.91E-54 | -3.47639759  |
| ACADL     | 1.01E-53 | -3.369927711 |
| COX7A1    | 1.72E-53 | -2.598481928 |
| GDF10     | 3.08E-53 | -3.793975904 |
| PI16      | 4.95E-53 | -4.384915663 |
| CDO1      | 6.20E-53 | -3.342626506 |
| GPR146    | 1.23E-52 | -2.096036145 |
| STX1A     | 1.75E-52 | 3.046927711  |
| SRPX      | 1.88E-52 | -3.267445783 |
| CCL14     | 2.15E-52 | -4.02786747  |
| CD93      | 3.98E-52 | -2.452614458 |
| LIMS2     | 8.20E-52 | -2.613650602 |
| COL6A6    | 1.09E-51 | -3.549891566 |
| HEG1      | 1.53E-51 | -2.27473494  |
| GLIPR2    | 2.05E-51 | -2.151421687 |
| WNT3A     | 2.57E-51 | -4.354108434 |
| HSPA12B   | 5.22E-51 | -2.814421687 |
| RPL13AP17 | 5.82E-51 | -3.61053012  |
| MCEMP1    | 9.08E-51 | -5.051819277 |
| MMP11     | 9.20E-51 | 5.120180723  |
| SPARCL1   | 1.16E-50 | -2.713596386 |
| FAM110D   | 1.47E-50 | -2.887620482 |
| SVEP1     | 1.53E-50 | -2.898951807 |
| LTC4S     | 1.79E-50 | -3.53213253  |
| FAM150B   | 3.16E-50 | -3.626084337 |
| FHL5      | 3.25E-50 | -2.571987952 |
| HIGD1B    | 5.54E-50 | -3.63726506  |
| HBB       | 8.17E-50 | -4.385626506 |
| C16orf59  | 9.59E-50 | 2.890891566  |
| CRYAB     | 9.62E-50 | -3.034253012 |
| TM6SF1    | 1.17E-49 | -2.512313253 |
| IGSF9     | 1.31E-49 | 3.308807229  |
| VWF       | 2.15E-49 | -2.245951807 |
| HBA2      | 2.61E-49 | -4.145915663 |
| NLRC4     | 3.00E-49 | -2.225373494 |
| RTKN2     | 1.38E-48 | -3.290578313 |
| C1orf162  | 1.76E-48 | -2.380614458 |
| CFD       | 2.30E-48 | -3.03673494  |
| CLEC14A   | 1.28E-47 | -2.641216867 |
| HBA1      | 2.57E-47 | -3.943385542 |
| TOP2A     | 3.01E-47 | 4.005566265  |
| HSPB2     | 4.60E-47 | -2.35573494  |
| FGFBP2    | 5.02E-47 | -3.41246988  |

|          |          |              |
|----------|----------|--------------|
| ACVRL1   | 6.96E-47 | -2.696072289 |
| C1orf186 | 6.97E-47 | -2.986108434 |
| OLFML1   | 9.12E-47 | -2.195445783 |
| DPEP2    | 9.12E-47 | -2.744084337 |
| ABI3BP   | 9.12E-47 | -2.960457831 |
| CENPF    | 1.90E-46 | 3.320746988  |
| SAPCD2   | 2.26E-46 | 3.406060241  |
| SLC31A2  | 2.47E-46 | -2.216819277 |
| PPP1R14A | 3.20E-46 | -2.192903614 |
| CCL23    | 3.37E-46 | -2.771855422 |
| TGFBR3   | 6.94E-46 | -2.540831325 |
| CPA3     | 8.67E-46 | -3.501578313 |
| EPAS1    | 9.41E-46 | -2.257       |
| MT1M     | 1.03E-45 | -4.468048193 |
| PTGER4   | 1.08E-45 | -2.146349398 |
| CD52     | 1.43E-45 | -2.846180723 |
| F10      | 2.00E-45 | -2.645289157 |
| RECQL4   | 2.22E-45 | 2.787084337  |
| CASQ2    | 2.53E-45 | -2.789771084 |
| TMEM100  | 3.15E-45 | -4.697192771 |
| MS4A2    | 3.77E-45 | -3.134939759 |
| PEBP4    | 3.79E-45 | -4.543433735 |
| EFCC1    | 4.03E-45 | -2.658253012 |
| PKNOX2   | 4.38E-45 | -2.361048193 |
| SERTM1   | 8.18E-45 | -2.187313253 |
| HSPC324  | 1.06E-44 | -3.367855422 |
| FPR2     | 1.18E-44 | -3.039457831 |
| FIGF     | 1.53E-44 | -3.379939759 |
| FXYP6    | 1.89E-44 | -2.250409639 |
| CDCA8    | 2.12E-44 | 2.551650602  |
| HOXA5    | 2.15E-44 | -2.478963855 |
| BCHE     | 2.62E-44 | -3.257855422 |
| ADH1A    | 4.30E-44 | -4.624373494 |
| VSIG4    | 6.38E-44 | -3.202710843 |
| GPT2     | 6.99E-44 | 2.480048193  |
| SELP     | 7.31E-44 | -2.651409639 |
| SDPR     | 1.86E-43 | -3.218433735 |
| CLDN5    | 2.03E-43 | -2.871216867 |
| CALCRL   | 2.18E-43 | -3.334433735 |
| STIL     | 2.81E-43 | 2.389216867  |
| LAMP3    | 3.29E-43 | -2.919325301 |
| TCEAL2   | 5.13E-43 | -3.510891566 |
| REM1     | 5.30E-43 | -2.47713253  |
| C2orf40  | 6.51E-43 | -4.264120482 |
| INMT     | 7.19E-43 | -3.73286747  |

|          |          |              |
|----------|----------|--------------|
| ARHGEF16 | 7.93E-43 | 2.294216867  |
| GIMAP4   | 1.32E-42 | -2.057807229 |
| CD300C   | 1.39E-42 | -3.018349398 |
| TMEM88   | 1.52E-42 | -2.520036145 |
| GIMAP8   | 1.56E-42 | -2.105313253 |
| ADRB2    | 1.75E-42 | -2.666566265 |
| C5AR1    | 1.79E-42 | -2.58460241  |
| FGD5     | 1.91E-42 | -2.398445783 |
| MAMDC2   | 2.79E-42 | -3.856831325 |
| GKN2     | 2.94E-42 | -5.438819277 |
| ADIRF    | 2.98E-42 | -3.043746988 |
| C10orf54 | 3.26E-42 | -2.211168675 |
| SOSTDC1  | 3.50E-42 | -3.993385542 |
| CPED1    | 3.53E-42 | -2.372710843 |
| SEMA6A   | 3.61E-42 | -2.938228916 |
| SERINC2  | 3.83E-42 | 2.958156627  |
| RASL12   | 4.86E-42 | -2.252361446 |
| VGLL3    | 6.20E-42 | -2.764927711 |
| SLC2A1   | 6.63E-42 | 2.939891566  |
| SOX7     | 7.90E-42 | -3.01883735  |
| FAM212A  | 9.43E-42 | -2.091445783 |
| ANGPT1   | 1.04E-41 | -2.946475904 |
| IGSF10   | 1.04E-41 | -2.376409639 |
| RAMP3    | 1.21E-41 | -3.011475904 |
| RASIP1   | 1.51E-41 | -2.37573494  |
| GIMAP5   | 1.69E-41 | -2.282457831 |
| CDC20    | 1.81E-41 | 3.024084337  |
| SRGN     | 1.92E-41 | -2.553048193 |
| CELSR3   | 2.05E-41 | 3.167156627  |
| GPX3     | 2.58E-41 | -2.180240964 |
| DES      | 3.26E-41 | -3.113783133 |
| ERO1A    | 3.45E-41 | 2.049891566  |
| PADI4    | 5.04E-41 | -2.847493976 |
| HOOK1    | 5.43E-41 | 2.413891566  |
| ANOS1    | 5.43E-41 | -3.171385542 |
| AOC3     | 8.39E-41 | -2.614939759 |
| FCGR1B   | 8.40E-41 | -2.830873494 |
| CDH13    | 1.04E-40 | -2.727192771 |
| FUT2     | 1.75E-40 | 3.497903614  |
| HCAR2    | 2.05E-40 | -2.541578313 |
| PROM2    | 2.12E-40 | 2.821626506  |
| MNDA     | 3.62E-40 | -3.284036145 |
| GCNT3    | 4.08E-40 | 4.924301205  |
| SASH1    | 5.08E-40 | -2.107331326 |
| TTK      | 5.09E-40 | 2.824746988  |

|         |          |              |
|---------|----------|--------------|
| KANK2   | 5.33E-40 | -2.21613253  |
| PCOLCE2 | 6.26E-40 | -3.690024096 |
| HBEGF   | 6.48E-40 | -2.515337349 |
| LMO2    | 7.54E-40 | -2.293301205 |
| GPD1    | 9.01E-40 | -2.630445783 |
| KRT8    | 9.14E-40 | 2.006337349  |
| FOXF1   | 9.68E-40 | -2.955855422 |
| HSPB6   | 1.05E-39 | -2.697698795 |
| ASPM    | 1.37E-39 | 3.265433735  |
| SCN4B   | 1.40E-39 | -2.605686747 |
| LRRN3   | 1.47E-39 | -2.8885      |
| TNNC1   | 1.94E-39 | -3.664204819 |
| ID3     | 2.00E-39 | -2.309891566 |
| FIBIN   | 2.26E-39 | -2.457072289 |
| PMP22   | 2.78E-39 | -2.601771084 |
| LHFP    | 2.95E-39 | -2.077542169 |
| FCN1    | 3.97E-39 | -2.962710843 |
| WIF1    | 4.31E-39 | -4.559108434 |
| ROBO4   | 4.67E-39 | -2.284710843 |
| CMTM2   | 5.67E-39 | -2.917879518 |
| TLR4    | 6.04E-39 | -2.012361446 |
| TK1     | 7.40E-39 | 2.639156627  |
| CCNF    | 8.05E-39 | 2.150373494  |
| FPR1    | 8.06E-39 | -3.420506024 |
| ACKR1   | 1.08E-38 | -3.682698795 |
| CCDC178 | 1.24E-38 | -3.193662651 |
| SPC24   | 1.30E-38 | 2.407674699  |
| AOX1    | 1.58E-38 | -2.998506024 |
| SNCA    | 1.74E-38 | -2.636150603 |
| CBLC    | 2.04E-38 | 2.625240964  |
| TIMP3   | 2.43E-38 | -2.535578313 |
| FXYD1   | 2.63E-38 | -2.572598394 |
| AQP4    | 3.38E-38 | -3.433198795 |
| CLEC12A | 4.27E-38 | -2.669957831 |
| GPC3    | 5.32E-38 | -3.300626506 |
| PID1    | 6.03E-38 | -2.998337349 |
| ITPKA   | 1.16E-37 | 4.456325301  |
| CDCA5   | 1.29E-37 | 2.652686747  |
| LILRA2  | 1.55E-37 | -2.913385542 |
| THBD    | 2.16E-37 | -2.550204819 |
| GPBAR1  | 2.33E-37 | -2.201662651 |
| CAMP    | 2.87E-37 | -3.689614458 |
| AURKB   | 3.12E-37 | 3.010457831  |
| HJURP   | 3.42E-37 | 2.663192771  |
| ANLN    | 3.53E-37 | 2.55346988   |

|          |          |              |
|----------|----------|--------------|
| SBSPON   | 3.73E-37 | -3.496746988 |
| CHTF18   | 3.94E-37 | 2.343120482  |
| RETN     | 3.99E-37 | -3.869421687 |
| SDHAP3   | 4.24E-37 | 2.518831325  |
| NECTIN4  | 4.60E-37 | 2.353385542  |
| UBE2T    | 4.63E-37 | 2.603855422  |
| PLEK2    | 5.61E-37 | 2.49453012   |
| NECAB1   | 7.30E-37 | -2.373198795 |
| FCN3     | 7.91E-37 | -4.299174699 |
| JAML     | 9.31E-37 | -2.132228916 |
| PROK2    | 1.05E-36 | -2.760506024 |
| MS4A7    | 1.13E-36 | -2.631933735 |
| GNG11    | 1.73E-36 | -3.050891566 |
| AQP9     | 1.74E-36 | -2.665144578 |
| SLC19A3  | 1.91E-36 | -3.281253012 |
| EFEMP1   | 1.92E-36 | -2.586759036 |
| ADAM8    | 2.18E-36 | 2.507156627  |
| PLA2G4F  | 2.21E-36 | -3.069180723 |
| SLIT3    | 2.43E-36 | -3.063054217 |
| C1QTNF7  | 2.45E-36 | -2.077662651 |
| PRC1     | 3.54E-36 | 2.13353012   |
| FOLR3    | 4.67E-36 | -4.097554217 |
| NCAPG    | 4.95E-36 | 2.612325301  |
| RECK     | 5.00E-36 | -2.361680723 |
| PRELP    | 5.00E-36 | -2.15060241  |
| BTNL9    | 5.48E-36 | -2.662951807 |
| ALOX5AP  | 6.73E-36 | -2.349301205 |
| F12      | 6.80E-36 | 2.478795181  |
| CPB2     | 7.85E-36 | -3.624313253 |
| ID2      | 7.92E-36 | -2.174771085 |
| GJC2     | 8.01E-36 | -2.419156627 |
| KIF2C    | 8.64E-36 | 2.521373494  |
| TPX2     | 1.02E-35 | 2.769855422  |
| ESAM     | 1.65E-35 | -2.228072289 |
| RNF43    | 1.71E-35 | 2.118493976  |
| TBX4     | 2.11E-35 | -2.106710843 |
| COL13A1  | 2.11E-35 | -2.313120482 |
| TMEM132A | 2.18E-35 | 2.271        |
| GJA4     | 2.39E-35 | -2.017987952 |
| ADTRP    | 2.45E-35 | -2.91386747  |
| WISP2    | 2.49E-35 | -2.896759036 |
| TMEM204  | 2.92E-35 | -2.012457831 |
| ADAMTS1  | 2.93E-35 | -2.814168675 |
| TROAP    | 2.97E-35 | 2.626795181  |
| HSPB8    | 3.24E-35 | -2.724108434 |

|           |          |              |
|-----------|----------|--------------|
| OLR1      | 3.27E-35 | -2.662084337 |
| WNT3      | 3.83E-35 | 2.066506024  |
| PRG4      | 3.94E-35 | -4.063       |
| OR7E37P   | 4.52E-35 | -2.056433735 |
| TMPRSS4   | 4.87E-35 | 2.980879518  |
| CES1P1    | 5.01E-35 | -3.705819277 |
| POLQ      | 5.40E-35 | 2.408746988  |
| CRTAC1    | 5.41E-35 | -3.803036145 |
| PTGDS     | 6.23E-35 | -2.630240964 |
| AURKA     | 7.36E-35 | 2.397885542  |
| AGTR1     | 7.38E-35 | -2.494319278 |
| CAV2      | 8.13E-35 | -2.979783133 |
| CD33      | 8.20E-35 | -2.610783133 |
| ADAMTSL3  | 8.65E-35 | -2.291915663 |
| CKAP2L    | 8.85E-35 | 2.599843373  |
| CDC45     | 8.99E-35 | 2.638337349  |
| IL6       | 1.01E-34 | -3.94139759  |
| RAMP2     | 1.12E-34 | -2.099843374 |
| HBG2      | 1.24E-34 | -3.643325301 |
| SOCS2     | 1.26E-34 | -2.623036145 |
| SALL4     | 1.29E-34 | 3.018674699  |
| COL10A1   | 1.44E-34 | 3.48446988   |
| KIAA1324L | 1.50E-34 | -2.679048193 |
| ARHGAP31  | 1.57E-34 | -2.095710843 |
| EGR2      | 1.96E-34 | -2.274096386 |
| TNFSF13   | 2.49E-34 | -2.219951808 |
| FBLN5     | 2.75E-34 | -2.223379519 |
| SLIT2     | 3.47E-34 | -2.067060241 |
| CDT1      | 3.70E-34 | 2.61513253   |
| HSD11B1   | 4.23E-34 | -2.397236948 |
| TMOD1     | 5.88E-34 | -2.54886747  |
| GRASP     | 6.75E-34 | -2.173289157 |
| FCER1G    | 7.04E-34 | -2.042759036 |
| SMAD6     | 7.09E-34 | -2.811795181 |
| KIF20A    | 8.61E-34 | 2.595831325  |
| HSPB3     | 8.90E-34 | -2.263554217 |
| CD69      | 9.95E-34 | -2.709849398 |
| TMEM45B   | 1.06E-33 | 2.796337349  |
| AUNIP     | 1.15E-33 | 2.051156627  |
| MARCO     | 1.33E-33 | -3.664638554 |
| C7        | 1.45E-33 | -3.42660241  |
| CLIC5     | 1.47E-33 | -3.141771084 |
| PLSCR4    | 1.74E-33 | -2.045855422 |
| TYROBP    | 2.07E-33 | -2.187168675 |
| PHLDA2    | 2.13E-33 | 2.711903614  |

|          |          |              |
|----------|----------|--------------|
| TUBB3    | 3.38E-33 | 3.395493976  |
| ANKRD1   | 3.82E-33 | -3.539566265 |
| NCF1     | 3.98E-33 | -3.43653012  |
| SPTBN2   | 4.60E-33 | 2.026433735  |
| C1QA     | 5.21E-33 | -2.307722892 |
| MAOB     | 5.85E-33 | -2.432759036 |
| FMO3     | 6.72E-33 | -2.49123494  |
| COLEC12  | 7.12E-33 | -2.483891566 |
| STXBP6   | 7.20E-33 | -3.101072289 |
| GPB1     | 1.13E-32 | -2.102722892 |
| CD300LF  | 1.52E-32 | -2.471807229 |
| GLIS2    | 1.66E-32 | 2.285036145  |
| PDK4     | 2.06E-32 | -3.018975904 |
| C1orf106 | 2.15E-32 | 2.53939759   |
| KCNA5    | 2.32E-32 | -2.217506024 |
| FGF11    | 2.71E-32 | 2.495012048  |
| CERCAM   | 2.73E-32 | 2.193325301  |
| LRRC36   | 3.10E-32 | -2.798698795 |
| CCNB1    | 3.15E-32 | 2.439843373  |
| CCNB2    | 3.22E-32 | 2.627746988  |
| ENPP2    | 3.31E-32 | -2.146343374 |
| DBNDD1   | 3.79E-32 | 2.105903615  |
| PDE2A    | 3.91E-32 | -2.014927711 |
| C8B      | 4.40E-32 | -2.956253012 |
| COL1A1   | 4.47E-32 | 2.859903614  |
| S100A4   | 4.61E-32 | -2.318548193 |
| LPL      | 4.75E-32 | -2.880783133 |
| COX4I2   | 5.73E-32 | -2.364746988 |
| ADGRE1   | 5.95E-32 | -2.023554217 |
| SFN      | 7.35E-32 | 2.60860241   |
| TMEM74B  | 8.12E-32 | -2.33626506  |
| MELK     | 9.40E-32 | 2.80063253   |
| CCNA2    | 1.03E-31 | 2.238084337  |
| CEP55    | 1.16E-31 | 2.28746988   |
| HBG1     | 1.23E-31 | -3.270807229 |
| BTG2     | 1.27E-31 | -2.154421687 |
| FUT3     | 1.35E-31 | 2.758168675  |
| CRABP2   | 1.62E-31 | 3.748759036  |
| RFTN2    | 2.43E-31 | -2.051674699 |
| LILRA5   | 2.79E-31 | -2.368722892 |
| FOXO1    | 3.40E-31 | 2.520198796  |
| KIF15    | 3.66E-31 | 2.113987952  |
| DLGAP5   | 4.13E-31 | 2.149180723  |
| ARHGAP44 | 4.19E-31 | -2.063409639 |
| WASF3    | 4.30E-31 | -2.336855422 |



|            |          |              |
|------------|----------|--------------|
| DNAJC22    | 4.90E-31 | 2.627240964  |
| SPDEF      | 6.77E-31 | 3.551216867  |
| RAB26      | 7.56E-31 | 2.291216867  |
| ALDH1A2    | 7.67E-31 | -2.518722892 |
| RHOD       | 9.31E-31 | 2.028156627  |
| ECM2       | 9.40E-31 | -2.025042169 |
| FAM189A2   | 9.80E-31 | -2.638638554 |
| SLC6A4     | 1.14E-30 | -3.801036145 |
| KIF11      | 1.25E-30 | 2.139578313  |
| HOXA4      | 1.39E-30 | -2.076939759 |
| KIFC1      | 1.48E-30 | 2.45039759   |
| MGP        | 1.57E-30 | -2.076090362 |
| ZFP36      | 1.75E-30 | -2.02926506  |
| OSR1       | 2.04E-30 | -2.351277108 |
| WFDC1      | 2.20E-30 | -2.576168675 |
| GATA2      | 2.33E-30 | -2.324879518 |
| SOX18      | 3.03E-30 | -2.55126506  |
| CCDC89     | 3.77E-30 | -2.080554217 |
| METTL7B    | 4.05E-30 | 3.185542169  |
| S100A8     | 4.32E-30 | -3.043554217 |
| GPA33      | 4.83E-30 | -2.576566265 |
| MARVELD3   | 6.27E-30 | 2.03151004   |
| SLC22A18AS | 7.67E-30 | 2.62446988   |
| XDH        | 8.61E-30 | 2.450373494  |
| ITLN1      | 1.10E-29 | -5.118361446 |
| ECT2       | 1.25E-29 | 2.00953012   |
| CNN1       | 1.35E-29 | -2.340120482 |
| HMMR       | 1.53E-29 | 2.493120482  |
| RGS17      | 1.72E-29 | 3.259879518  |
| CST1       | 2.01E-29 | 4.753855422  |
| GIMAP1     | 2.42E-29 | -2.055939759 |
| AADAC      | 3.94E-29 | -3.180180723 |
| MYH4       | 4.49E-29 | -2.136518072 |
| KIF4A      | 4.87E-29 | 2.259566265  |
| TMEM178A   | 4.88E-29 | -2.33486747  |
| DPT        | 5.44E-29 | -2.638301205 |
| HSD17B6    | 5.52E-29 | -3.27353012  |
| NPNT       | 6.90E-29 | -2.288301205 |
| SH3GL2     | 7.15E-29 | -2.570710843 |
| PODXL2     | 9.48E-29 | 2.940012048  |
| KIF26B     | 9.62E-29 | 2.136698795  |
| GOLGA7B    | 1.02E-28 | 2.616518072  |
| PLA2G1B    | 1.16E-28 | -4.083975904 |
| CDCA3      | 1.24E-28 | 2.384481928  |
| LEFTY2     | 1.26E-28 | -2.234915663 |

|          |          |              |
|----------|----------|--------------|
| GLDN     | 1.56E-28 | -2.943108434 |
| CYP4B1   | 2.21E-28 | -4.088295181 |
| CXCR2    | 2.22E-28 | -2.165771084 |
| ASF1B    | 2.48E-28 | 2.192240964  |
| PLEKHG6  | 3.16E-28 | 2.058096386  |
| C17orf53 | 4.21E-28 | 2.230385542  |
| IL1B     | 5.01E-28 | -2.672228916 |
| CD163    | 5.15E-28 | -2.155028112 |
| VIPR1    | 5.50E-28 | -2.175927711 |
| TSPAN7   | 7.10E-28 | -3.315674699 |
| TUBB6    | 9.20E-28 | -2.245759037 |
| NCF2     | 1.01E-27 | -2.040313253 |
| UNC5CL   | 1.13E-27 | 2.071156627  |
| GPM6B    | 1.46E-27 | -2.853257028 |
| PDE7B    | 1.56E-27 | -2.104445783 |
| HMGB3    | 1.94E-27 | 2.767036145  |
| EEF1A2   | 2.03E-27 | 5.045012048  |
| DUOXA1   | 2.12E-27 | -2.566951807 |
| FERMT1   | 2.21E-27 | 2.414289157  |
| SPP1     | 2.98E-27 | 3.844530121  |
| NIM1K    | 3.06E-27 | -2.277771084 |
| MAL      | 3.29E-27 | -2.295957831 |
| KCNK5    | 3.64E-27 | 2.039048193  |
| RALGPS2  | 3.73E-27 | 2.156626506  |
| MSRB3    | 5.63E-27 | -2.466799197 |
| BUB1     | 5.76E-27 | 2.246578313  |
| CTSG     | 7.53E-27 | -3.22853012  |
| GJB2     | 7.95E-27 | 3.035036145  |
| ATP10B   | 8.61E-27 | 3.259361446  |
| F13A1    | 1.09E-26 | -2.504975904 |
| NOSTRIN  | 1.22E-26 | -2.245445783 |
| CXCL2    | 1.26E-26 | -2.875686747 |
| GSTM3    | 1.52E-26 | -2.287349398 |
| CD36     | 1.55E-26 | -3.57313253  |
| CA2      | 2.19E-26 | -2.558319277 |
| TRIM46   | 2.21E-26 | 2.009        |
| ESPN     | 2.59E-26 | 2.625987952  |
| CNFN     | 2.65E-26 | 2.152506024  |
| CACNA2D2 | 2.95E-26 | -2.45960241  |
| TPPP     | 2.97E-26 | -2.050337349 |
| SIX1     | 3.75E-26 | 2.345337349  |
| ZBED2    | 4.03E-26 | -2.83826506  |
| CYTL1    | 4.30E-26 | -2.390277108 |
| STK32A   | 4.70E-26 | 2.415686747  |
| FCER1A   | 5.02E-26 | -3.025409639 |

|          |          |              |
|----------|----------|--------------|
| MS4A15   | 6.04E-26 | -3.273108434 |
| CDH3     | 6.05E-26 | 2.825072289  |
| GLB1L2   | 6.90E-26 | 2.544506024  |
| FAM64A   | 7.46E-26 | 2.074240964  |
| LCN6     | 8.04E-26 | -2.064650602 |
| PLXNB3   | 1.62E-25 | 2.033554217  |
| CXCL12   | 1.69E-25 | -2.707084338 |
| NMU      | 1.81E-25 | 3.283096386  |
| AQP1     | 1.83E-25 | -2.858783133 |
| TPSAB1   | 1.88E-25 | -2.525686747 |
| SPAG4    | 2.49E-25 | 2.139277108  |
| ACTG2    | 2.50E-25 | -2.115144578 |
| SIX4     | 3.07E-25 | 2.247674699  |
| GAS1     | 3.86E-25 | -2.451066266 |
| VEPH1    | 4.80E-25 | -2.127036145 |
| CAPN12   | 5.52E-25 | 2.368855422  |
| DAPK2    | 7.38E-25 | -2.012915663 |
| CYP27B1  | 1.10E-24 | 2.144180723  |
| S100A3   | 1.13E-24 | -2.668373494 |
| DEFA1    | 1.15E-24 | -2.938572289 |
| DEFA1B   | 2.21E-24 | -2.263108434 |
| ADARB1   | 2.96E-24 | -2.046722892 |
| REEP1    | 4.13E-24 | -2.338915663 |
| CLC      | 4.50E-24 | -2.450313253 |
| KRT4     | 5.89E-24 | -2.451253012 |
| MUC20    | 6.53E-24 | 2.413554217  |
| PTGES    | 6.66E-24 | 2.10060241   |
| MMP9     | 8.81E-24 | 2.69673494   |
| BMP6     | 9.49E-24 | -2.178590361 |
| FAM181A  | 1.19E-23 | -2.536771084 |
| MYH11    | 1.28E-23 | -2.35776506  |
| S100A12  | 1.31E-23 | -2.08913253  |
| FOSB     | 1.53E-23 | -3.385204819 |
| ITM2A    | 1.81E-23 | -2.067861446 |
| PLA2G3   | 2.01E-23 | -2.142373494 |
| PITX1    | 2.41E-23 | 3.919144578  |
| CCL2     | 2.79E-23 | -2.010289157 |
| COLGALT2 | 2.98E-23 | -2.194072289 |
| APLN     | 4.65E-23 | -2.014518072 |
| ANXA3    | 7.43E-23 | -2.464325301 |
| COMP     | 8.68E-23 | 3.730554217  |
| NRIP3    | 1.01E-22 | 2.077060241  |
| PGC      | 1.49E-22 | -4.334975904 |
| SFTPC    | 1.76E-22 | -4.338289157 |
| CDKN3    | 2.97E-22 | 2.086746988  |

|           |          |              |
|-----------|----------|--------------|
| PBK       | 3.00E-22 | 2.085192771  |
| ABCA3     | 4.79E-22 | -2.145289157 |
| SFRP1     | 1.26E-21 | -2.589216867 |
| FRAS1     | 1.66E-21 | -2.492927711 |
| XKRX      | 2.17E-21 | 2.553240964  |
| LYZ       | 2.18E-21 | -2.875963856 |
| DEFA3     | 2.79E-21 | -2.328060241 |
| GPR37     | 3.00E-21 | 2.556108434  |
| CA9       | 4.32E-21 | 2.879445783  |
| RERG      | 4.82E-21 | -2.009759036 |
| SEMA5A    | 5.60E-21 | -2.191548193 |
| PLAC8     | 6.23E-21 | -2.390608434 |
| PTPRH     | 7.55E-21 | 2.07046988   |
| KISS1R    | 8.81E-21 | 2.800746988  |
| CCNO      | 1.08E-20 | 2.02313253   |
| GOLGA8A   | 1.23E-20 | 2.293289157  |
| SFTPD     | 1.46E-20 | -2.583409639 |
| CCL3      | 1.56E-20 | -2.315710843 |
| GATA6-AS1 | 1.59E-20 | -2.144313253 |
| CTHRC1    | 1.77E-20 | 2.276096386  |
| SLC1A1    | 2.04E-20 | -2.17786747  |
| ALG1L     | 2.39E-20 | 2.562596386  |
| FAM167A   | 3.08E-20 | -2.210144578 |
| SLPI      | 3.24E-20 | -2.457903614 |
| LRRK2     | 3.72E-20 | -2.12846988  |
| SPINK1    | 5.08E-20 | 4.416626506  |
| SUSD2     | 6.46E-20 | -2.189855422 |
| FAM178B   | 1.11E-19 | 2.081072289  |
| CLPSL2    | 2.94E-19 | 2.242048193  |
| BCO1      | 3.75E-19 | 2.077614458  |
| TMSB15A   | 4.40E-19 | -2.453457831 |
| BIRC5     | 4.68E-19 | 2.36386747   |
| KCNK12    | 6.32E-19 | 2.331506024  |
| ARSE      | 1.48E-18 | 2.047108434  |
| ZNF385B   | 2.80E-18 | -2.709903614 |
| MBTD1     | 3.28E-18 | 2.515493976  |
| ROPN1L    | 5.56E-18 | -2.60786747  |
| IGFBP6    | 7.80E-18 | -2.021409639 |
| ALPL      | 1.16E-17 | -2.170759036 |
| SLN       | 1.19E-17 | -2.240253012 |
| FAM216B   | 1.39E-17 | -2.954975904 |
| GALNT3    | 1.44E-17 | 2.073939759  |
| SYT12     | 1.86E-17 | 2.113951807  |
| C11orf88  | 2.09E-17 | -2.943192771 |
| KRT80     | 2.42E-17 | 2.103843374  |

|           |          |              |
|-----------|----------|--------------|
| SCGB1A1   | 2.59E-17 | -4.57286747  |
| CP        | 2.87E-17 | 2.332120482  |
| P3H2      | 4.97E-17 | -2.028060241 |
| C6        | 5.17E-17 | -2.431506024 |
| FOXA3     | 6.28E-17 | 2.257373494  |
| MT1E      | 1.12E-16 | -2.011632531 |
| STRA6     | 1.30E-16 | 2.116927711  |
| ARMCX1    | 1.41E-16 | -2.034771084 |
| FOXP1-IT1 | 1.75E-16 | 2.01039759   |
| ALDH1A1   | 1.82E-16 | -2.346710844 |
| SSTR2     | 2.21E-16 | 2.15613253   |
| SCG5      | 2.68E-16 | 2.50886747   |
| VSTM2L    | 2.74E-16 | 2.396325301  |
| SFTPA1    | 3.14E-16 | -3.955987952 |
| LMOD3     | 3.29E-16 | 2.085975904  |
| EFCAB1    | 3.72E-16 | -2.719108434 |
| BAIAP2L2  | 3.73E-16 | 2.317120482  |
| CEACAM5   | 6.33E-16 | 3.433506024  |
| MAP7D2    | 7.17E-16 | 2.044626506  |
| NEK2      | 7.70E-16 | 2.12713253   |
| DNAJC12   | 9.93E-16 | 2.350542169  |
| MORN5     | 1.24E-15 | -2.184144578 |
| CXCL5     | 2.38E-15 | -2.107945783 |
| CH25H     | 2.51E-15 | -2.157614458 |
| VSIG2     | 2.81E-15 | -2.467506024 |
| CFAP77    | 2.95E-15 | -2.15313253  |
| C22orf15  | 3.91E-15 | -2.049518072 |
| MMP1      | 4.55E-15 | 2.216313253  |
| LOC729860 | 4.68E-15 | 2.038216867  |
| C20orf85  | 6.66E-15 | -2.847819277 |
| LEMD1     | 8.83E-15 | 2.042361446  |
| TMPRSS6   | 9.06E-15 | 2.186385542  |
| ITCH-IT1  | 1.48E-14 | 2.254879518  |
| MSR1      | 3.08E-14 | -2.168289156 |
| PLA2G2A   | 3.53E-14 | -2.052060241 |
| PSG1      | 3.63E-14 | 2.411614458  |
| SLC16A9   | 5.34E-14 | 2.014626506  |
| TEKT1     | 6.09E-14 | -2.518795181 |
| IGF2BP3   | 6.46E-14 | 2.273686747  |
| SCGB3A2   | 7.39E-14 | -2.535012048 |
| HABP2     | 1.05E-13 | 2.377072289  |
| B3GNT6    | 3.62E-13 | 2.157313253  |
| TMEM190   | 4.42E-13 | -2.147036145 |
| ABCA4     | 5.27E-13 | 2.226795181  |
| ZBTB16    | 5.33E-13 | -2.137594377 |

|         |          |              |
|---------|----------|--------------|
| CYP24A1 | 5.37E-13 | 2.373879518  |
| CXCL13  | 6.03E-13 | 2.065746988  |
| SLC39A8 | 6.75E-13 | -2.308819277 |
| DNAH2   | 1.30E-12 | 2.088939759  |
| WDR66   | 1.79E-12 | 2.62639759   |
| PCP4    | 2.12E-12 | 2.835445783  |
| MUC21   | 2.54E-12 | 2.012885542  |
| KLF4    | 4.26E-12 | 2.933710844  |
| MUC16   | 6.80E-12 | 2.48846988   |
| MMP12   | 8.35E-12 | 2.41283735   |
| C4BPA   | 8.90E-12 | -2.134024096 |
| KRT15   | 1.63E-11 | 2.114216867  |
| BEX1    | 1.69E-11 | -2.035355422 |
| MYEOV   | 4.46E-11 | 2.036903614  |
| SHISA2  | 8.26E-11 | -2.133903614 |
| ABCA8   | 8.85E-11 | -2.12736747  |
| CDHR3   | 2.22E-10 | -2.131542169 |
| UBE2C   | 3.11E-10 | 2.219493976  |
| AOC1    | 5.67E-10 | 2.03546988   |
| HP      | 9.95E-10 | -2.124048193 |
| GPX2    | 1.15E-09 | 2.706493976  |
| FAM83A  | 1.28E-09 | 3.353305221  |
| MS4A8   | 1.58E-09 | -2.218759036 |
| KIF1A   | 1.59E-09 | 2.247650602  |
| TM4SF4  | 4.14E-09 | 2.347807229  |
| AKR1B10 | 6.16E-09 | 2.326626506  |
| SCGB3A1 | 8.00E-09 | -2.10573494  |
| TCN1    | 3.19E-08 | 2.385240964  |
| CRLF1   | 6.25E-08 | 2.02239759   |
| PAEP    | 2.37E-07 | 2.05783735   |
| DCN     | 2.17E-06 | -2.561927711 |
| PGM5    | 3.62E-06 | -2.06606747  |

**Table S2.** List of Differentially Expressed miRNAs (DEMs) in NSCLC

| miRNA_ID        | adj.P.Val | logFC        |
|-----------------|-----------|--------------|
| hsa-miR-135a-3p | 5.08E-22  | 0.512769973  |
| hsa-miR-4301    | 1.19E-20  | 0.299462336  |
| hsa-miR-4721    | 1.23E-19  | 0.727174851  |
| hsa-miR-1306-3p | 1.26E-19  | 0.344086877  |
| hsa-miR-4465    | 2.21E-19  | 0.658898648  |
| hsa-miR-320a    | 6.16E-19  | 0.484948304  |
| hsa-miR-296-5p  | 5.56E-18  | -0.837156692 |
| hsa-miR-3935    | 8.61E-18  | 0.305621515  |

|                 |          |              |
|-----------------|----------|--------------|
| hsa-miR-5189    | 2.16E-17 | 0.517632038  |
| hsa-miR-5580-3p | 2.89E-17 | 0.238891697  |
| hsa-miR-4430    | 4.49E-17 | 0.486193025  |
| hsa-miR-302f    | 4.71E-17 | -0.24804573  |
| hsa-miR-4793-5p | 4.71E-17 | 0.409991705  |
| hsa-miR-4442    | 1.48E-16 | 0.555100877  |
| hsa-miR-3180-3p | 1.52E-16 | -0.729492197 |
| hsa-miR-4653-3p | 6.00E-16 | 0.662450899  |
| hsa-miR-4499    | 3.80E-15 | 0.473188139  |
| hsa-miR-3972    | 1.03E-14 | -0.549521473 |
| hsa-miR-4496    | 1.45E-14 | 0.439847873  |
| hsa-miR-602     | 1.58E-14 | 0.342729443  |
| hsa-miR-4769-3p | 1.58E-14 | -0.620769774 |
| hsa-miR-1228-3p | 1.86E-14 | -0.56267776  |
| hsa-miR-1237    | 1.86E-14 | -0.726393416 |
| hsa-miR-4476    | 1.97E-14 | 0.589765543  |
| hsa-miR-542-5p  | 3.52E-14 | 0.407148887  |
| hsa-miR-889     | 3.73E-14 | 0.306985536  |
| hsa-miR-1243    | 4.15E-14 | 0.180831486  |
| hsa-miR-4648    | 4.56E-14 | 0.318277584  |
| hsa-miR-3679-3p | 5.29E-14 | -0.517127424 |
| hsa-miR-4293    | 6.72E-14 | 0.141527777  |
| hsa-miR-4514    | 1.03E-13 | 0.234426281  |
| hsa-miR-5009-5p | 1.04E-13 | 0.543471198  |
| hsa-miR-4647    | 1.22E-13 | 0.329988182  |
| hsa-miR-3934    | 1.37E-13 | 0.538122337  |
| hsa-miR-642a-3p | 1.98E-13 | 0.404619871  |
| hsa-miR-4635    | 2.74E-13 | 0.42920817   |
| hsa-miR-1266    | 5.68E-13 | 0.202080053  |
| hsa-miR-4773    | 1.11E-12 | 0.228269243  |
| hsa-miR-4462    | 1.11E-12 | 0.434025036  |
| hsa-miR-564     | 1.32E-12 | 0.238087819  |
| hsa-miR-4487    | 1.32E-12 | 0.290286376  |
| hsa-miR-4749-3p | 1.32E-12 | -0.673482122 |
| hsa-miR-548w    | 1.53E-12 | -0.177861742 |
| hsa-miR-1225-3p | 1.53E-12 | 0.399043884  |
| hsa-miR-4470    | 1.72E-12 | 0.461355184  |
| hsa-miR-125b-5p | 1.89E-12 | -0.544394925 |
| hsa-miR-3907    | 2.41E-12 | 0.556636286  |
| hsa-miR-3648    | 3.34E-12 | 0.368826879  |
| hsa-miR-891a    | 3.42E-12 | 0.269049002  |
| hsa-miR-3676-3p | 3.50E-12 | -0.58244119  |
| hsa-miR-1910    | 4.09E-12 | 0.191494282  |
| hsa-miR-3663-3p | 4.67E-12 | 0.446301706  |
| hsa-miR-4535    | 7.32E-12 | 0.256901866  |

|                  |          |              |
|------------------|----------|--------------|
| hsa-miR-4800-5p  | 7.39E-12 | 0.443083534  |
| hsa-miR-3917     | 7.44E-12 | 0.34018405   |
| hsa-miR-3622b-3p | 9.42E-12 | 0.159900356  |
| hsa-miR-1249     | 9.80E-12 | -0.66020537  |
| hsa-miR-34c-3p   | 1.27E-11 | 0.33374588   |
| hsa-miR-4477a    | 1.33E-11 | 0.184027055  |
| hsa-miR-3188     | 1.42E-11 | 0.602165107  |
| hsa-miR-1305     | 1.56E-11 | 0.402410165  |
| hsa-miR-4655-5p  | 1.61E-11 | 0.371894104  |
| hsa-miR-3911     | 1.75E-11 | 0.417463495  |
| hsa-miR-4478     | 1.91E-11 | 0.358794403  |
| hsa-miR-940      | 1.91E-11 | -0.564929338 |
| hsa-miR-1268b    | 1.99E-11 | 0.417103868  |
| hsa-miR-100-5p   | 1.99E-11 | -0.529599592 |
| hsa-miR-4634     | 2.24E-11 | 0.46377103   |
| hsa-miR-4277     | 3.75E-11 | -0.147983998 |
| hsa-miR-4475     | 3.89E-11 | 0.329428017  |
| hsa-miR-4274     | 4.58E-11 | -0.638206766 |
| hsa-miR-1234     | 4.68E-11 | -0.478850382 |
| hsa-miR-4793-3p  | 5.53E-11 | 0.374523974  |
| hsa-miR-4743     | 6.97E-11 | 0.343098461  |
| hsa-miR-1471     | 9.07E-11 | 0.245222678  |
| hsa-miR-4435     | 9.89E-11 | 0.145904596  |
| hsa-miR-4640-5p  | 1.13E-10 | 0.386486923  |
| hsa-miR-2392     | 1.15E-10 | 0.464158223  |
| hsa-miR-1224-3p  | 1.15E-10 | -0.472806809 |
| hsa-miR-3659     | 1.34E-10 | 0.254015541  |
| hsa-miR-4460     | 1.39E-10 | -0.212063913 |
| hsa-miR-5190     | 1.39E-10 | 0.312441956  |
| hsa-miR-1538     | 1.46E-10 | -0.590298992 |
| hsa-let-7d-5p    | 1.81E-10 | -0.650869716 |
| hsa-miR-4664-3p  | 1.87E-10 | -0.536657157 |
| hsa-miR-890      | 1.88E-10 | 0.167440841  |
| hsa-miR-4746-3p  | 2.36E-10 | 0.354410299  |
| hsa-let-7a-5p    | 2.38E-10 | -0.784227989 |
| hsa-miR-548f     | 2.41E-10 | -0.157487902 |
| hsa-miR-382-3p   | 2.41E-10 | -0.296048696 |
| hsa-miR-574-3p   | 2.74E-10 | 0.200717737  |
| hsa-miR-550a-5p  | 2.98E-10 | 0.341344454  |
| hsa-miR-4795-3p  | 3.03E-10 | -0.191879904 |
| hsa-miR-525-5p   | 3.12E-10 | -0.348268321 |
| hsa-miR-761      | 3.14E-10 | -0.262426903 |
| hsa-miR-3614-5p  | 3.95E-10 | -0.463095986 |
| hsa-miR-4304     | 4.28E-10 | 0.151422659  |
| hsa-miR-4433-5p  | 4.35E-10 | -0.528755464 |



|                 |          |              |
|-----------------|----------|--------------|
| hsa-miR-4507    | 4.84E-10 | 0.387697009  |
| hsa-miR-3666    | 5.07E-10 | 0.182133724  |
| hsa-let-7f-1-3p | 5.50E-10 | -0.463644056 |
| hsa-let-7f-5p   | 7.83E-10 | -0.525687484 |
| hsa-miR-302e    | 8.27E-10 | -0.16910391  |
| hsa-miR-3944-5p | 9.07E-10 | 0.384057464  |
| hsa-miR-4669    | 9.30E-10 | 0.344711634  |
| hsa-miR-5095    | 1.12E-09 | 0.454827951  |
| hsa-miR-4757-3p | 1.30E-09 | -0.134363677 |
| hsa-miR-4298    | 1.31E-09 | 0.424052056  |
| hsa-miR-486-5p  | 1.31E-09 | -0.606467807 |
| hsa-miR-3938    | 1.37E-09 | 0.102400447  |
| hsa-miR-3615    | 1.53E-09 | 0.161149372  |
| hsa-miR-5684    | 1.53E-09 | 0.351163823  |
| hsa-miR-3925-5p | 1.56E-09 | 0.293880997  |
| hsa-miR-2276    | 1.56E-09 | 0.362908642  |
| hsa-miR-3654    | 1.84E-09 | 0.231126438  |
| hsa-miR-1469    | 2.30E-09 | 0.352780865  |
| hsa-miR-4787-3p | 2.30E-09 | -0.436357634 |
| hsa-miR-1224-5p | 2.43E-09 | -0.58688235  |
| hsa-miR-5010-3p | 2.43E-09 | -0.745889279 |
| hsa-miR-593-5p  | 2.74E-09 | 0.345561272  |
| hsa-miR-766-3p  | 2.93E-09 | -0.594414646 |
| hsa-miR-1208    | 2.93E-09 | 0.373692476  |
| hsa-miR-5699    | 3.09E-09 | 0.217514742  |
| hsa-let-7e-3p   | 3.25E-09 | -0.255373604 |
| hsa-miR-4665-3p | 3.87E-09 | -0.572606176 |
| hsa-miR-99a-5p  | 3.97E-09 | -0.435827897 |
| hsa-miR-1238    | 3.97E-09 | -0.471601908 |
| hsa-miR-4728-3p | 4.01E-09 | -0.550138318 |
| hsa-miR-134     | 4.02E-09 | 0.490419397  |
| hsa-miR-3065-5p | 4.20E-09 | -0.158747844 |
| hsa-miR-629-3p  | 4.32E-09 | 0.113922467  |
| hsa-miR-320b    | 4.47E-09 | 0.493301421  |
| hsa-miR-526b-5p | 5.12E-09 | 0.609904683  |
| hsa-miR-548e    | 5.21E-09 | -0.160535861 |
| hsa-miR-4661-5p | 5.64E-09 | -0.149462685 |
| hsa-miR-4667-3p | 5.64E-09 | -0.58834733  |
| hsa-miR-3918    | 5.85E-09 | 0.312804655  |
| hsa-miR-133a    | 6.11E-09 | -0.358742435 |
| hsa-miR-4751    | 6.52E-09 | 0.191511152  |
| hsa-miR-3937    | 6.52E-09 | 0.525856727  |
| hsa-miR-1307-3p | 6.57E-09 | 0.287113352  |
| hsa-miR-4536-5p | 7.19E-09 | 0.242514208  |
| hsa-miR-324-3p  | 7.22E-09 | -0.367923932 |

|                 |          |              |
|-----------------|----------|--------------|
| hsa-miR-4795-5p | 8.62E-09 | -0.213468412 |
| hsa-miR-4753-5p | 8.63E-09 | 0.437967785  |
| hsa-miR-3137    | 8.72E-09 | 0.302890719  |
| hsa-miR-191-5p  | 8.90E-09 | -0.376294395 |
| hsa-miR-3121-3p | 1.14E-08 | 0.315177243  |
| hsa-miR-3929    | 1.20E-08 | -0.142427548 |
| hsa-miR-3162-3p | 1.51E-08 | -0.532310685 |
| hsa-miR-4799-5p | 1.64E-08 | -0.252524446 |
| hsa-miR-575     | 1.69E-08 | 0.516608461  |
| hsa-miR-4788    | 1.70E-08 | 0.40244077   |
| hsa-miR-4494    | 2.03E-08 | 0.182850906  |
| hsa-miR-4429    | 2.36E-08 | 0.278002251  |
| hsa-miR-1181    | 2.42E-08 | 0.385628009  |
| hsa-miR-26b-3p  | 2.48E-08 | -0.21965348  |
| hsa-miR-4716-5p | 2.48E-08 | -0.625680012 |
| hsa-miR-548aw   | 3.05E-08 | -0.178875994 |
| hsa-miR-2116-3p | 3.07E-08 | -0.459194056 |
| hsa-miR-3679-5p | 3.49E-08 | 0.30113208   |
| hsa-miR-3944-3p | 3.55E-08 | -0.310497687 |
| hsa-miR-4486    | 3.66E-08 | 0.346693496  |
| hsa-miR-3199    | 3.77E-08 | 0.168544964  |
| hsa-miR-4772-5p | 3.99E-08 | -0.114441116 |
| hsa-miR-4735-5p | 4.05E-08 | -0.141023627 |
| hsa-miR-3074-3p | 4.37E-08 | 0.227840873  |
| hsa-miR-1227    | 4.46E-08 | -0.503686299 |
| hsa-miR-197-3p  | 4.68E-08 | -0.132032082 |
| hsa-let-7b-5p   | 4.93E-08 | -0.719254544 |
| hsa-miR-484     | 5.27E-08 | -0.402136813 |
| hsa-miR-378b    | 7.30E-08 | 0.247910386  |
| hsa-miR-4459    | 7.68E-08 | 0.338111744  |
| hsa-miR-4734    | 7.68E-08 | 0.340950893  |
| hsa-miR-4538    | 7.74E-08 | 0.348204531  |
| hsa-miR-4643    | 7.90E-08 | 0.14913525   |
| hsa-miR-4713-3p | 8.32E-08 | 0.217660029  |
| hsa-miR-3197    | 8.51E-08 | 0.304424983  |
| hsa-miR-4766-3p | 8.86E-08 | -0.115457803 |
| hsa-miR-4526    | 1.01E-07 | 0.188952243  |
| hsa-miR-4468    | 1.01E-07 | 0.299589178  |
| hsa-miR-1281    | 1.06E-07 | -0.386745904 |
| hsa-miR-1282    | 1.08E-07 | -0.161065003 |
| hsa-miR-3184-3p | 1.08E-07 | -0.45390113  |
| hsa-miR-4473    | 1.18E-07 | -0.108648589 |
| hsa-miR-2681-5p | 1.18E-07 | 0.201270156  |
| hsa-miR-4497    | 1.22E-07 | 0.257784979  |
| hsa-miR-3605-5p | 1.30E-07 | 0.218766275  |

|                  |          |              |
|------------------|----------|--------------|
| hsa-miR-4513     | 1.33E-07 | 0.351283598  |
| hsa-miR-1291     | 1.39E-07 | 0.175832195  |
| hsa-miR-4728-5p  | 1.55E-07 | 0.443316521  |
| hsa-miR-519a-3p  | 1.74E-07 | -0.167257477 |
| hsa-miR-3660     | 1.75E-07 | 0.209334091  |
| hsa-miR-143-5p   | 1.85E-07 | -0.160135176 |
| hsa-miR-1294     | 1.93E-07 | -0.113984618 |
| hsa-miR-3973     | 1.96E-07 | 0.150523362  |
| hsa-miR-4519     | 1.98E-07 | 0.132603425  |
| hsa-miR-4436a    | 1.98E-07 | 0.225318434  |
| hsa-miR-126-3p   | 2.00E-07 | -0.668668496 |
| hsa-miR-146a-5p  | 2.13E-07 | -0.332925691 |
| hsa-miR-1825     | 2.19E-07 | -0.301386676 |
| hsa-miR-301a-3p  | 2.20E-07 | -0.123548672 |
| hsa-miR-1295a    | 2.40E-07 | 0.127135658  |
| hsa-miR-1286     | 2.43E-07 | 0.140637808  |
| hsa-miR-656      | 2.48E-07 | -0.166961847 |
| hsa-miR-5195-3p  | 2.48E-07 | 0.413150444  |
| hsa-miR-4738-3p  | 2.49E-07 | 0.293063325  |
| hsa-miR-4489     | 2.54E-07 | 0.177654985  |
| hsa-miR-676-3p   | 2.71E-07 | -0.124118351 |
| hsa-miR-557      | 2.75E-07 | -0.436390872 |
| hsa-miR-548at-5p | 2.76E-07 | -0.146167923 |
| hsa-miR-3190-5p  | 2.76E-07 | -0.5430664   |
| hsa-miR-3689f    | 2.81E-07 | 0.121156381  |
| hsa-miR-631      | 2.93E-07 | 0.130339419  |
| hsa-miR-181b-3p  | 2.98E-07 | -0.114952422 |
| hsa-miR-1470     | 3.01E-07 | -0.402821477 |
| hsa-miR-3678-3p  | 3.18E-07 | 0.258667763  |
| hsa-miR-4664-5p  | 3.30E-07 | -0.568712819 |
| hsa-miR-3177-3p  | 3.39E-07 | 0.257484641  |
| hsa-miR-149-5p   | 3.44E-07 | -0.114457143 |
| hsa-miR-4529-5p  | 3.56E-07 | 0.178984631  |
| hsa-miR-211-3p   | 3.66E-07 | 0.428935719  |
| hsa-let-7g-5p    | 4.09E-07 | -0.43107786  |
| hsa-miR-3691-3p  | 4.26E-07 | -0.106475412 |
| hsa-miR-5708     | 4.26E-07 | 0.127023308  |
| hsa-miR-3682-3p  | 4.26E-07 | 0.190728465  |
| hsa-miR-3184-5p  | 4.38E-07 | -0.571276834 |
| hsa-miR-4445-3p  | 4.50E-07 | 0.15568628   |
| hsa-miR-664-3p   | 4.50E-07 | -0.519083619 |
| hsa-miR-4530     | 4.53E-07 | 0.298985824  |
| hsa-miR-548q     | 4.99E-07 | 0.565848338  |
| hsa-miR-3150b-5p | 5.13E-07 | -0.380865114 |
| hsa-miR-4711-3p  | 5.64E-07 | -0.125797455 |

|                  |          |              |
|------------------|----------|--------------|
| hsa-miR-4708-3p  | 5.64E-07 | 0.271509982  |
| hsa-miR-379-5p   | 6.05E-07 | 0.156126669  |
| hsa-miR-509-3-5p | 6.05E-07 | 0.231875645  |
| hsa-miR-4699-3p  | 6.16E-07 | -0.23435197  |
| hsa-miR-218-2-3p | 6.26E-07 | 0.231215383  |
| hsa-miR-4638-3p  | 6.95E-07 | 0.148265136  |
| hsa-miR-30d-5p   | 7.95E-07 | -0.587362376 |
| hsa-miR-5096     | 8.16E-07 | 0.233578199  |
| hsa-miR-5581-5p  | 8.61E-07 | 0.269321188  |
| hsa-miR-4649-3p  | 8.71E-07 | -0.496060056 |
| hsa-miR-3138     | 8.81E-07 | 0.255751782  |
| hsa-miR-4518     | 9.78E-07 | 0.191101253  |
| hsa-miR-3120-5p  | 1.03E-06 | -0.113580957 |
| hsa-miR-3920     | 1.04E-06 | -0.109419213 |
| hsa-miR-4800-3p  | 1.04E-06 | 0.14872709   |
| hsa-miR-423-3p   | 1.08E-06 | -0.338646558 |
| hsa-miR-548ao-3p | 1.12E-06 | 0.228560006  |
| hsa-miR-3620     | 1.22E-06 | 0.209575906  |
| hsa-miR-4646-5p  | 1.29E-06 | 0.306317659  |
| hsa-miR-4723-3p  | 1.33E-06 | -0.489665583 |
| hsa-miR-1909-5p  | 1.38E-06 | 0.23586569   |
| hsa-miR-199b-5p  | 1.45E-06 | -0.180446675 |
| hsa-miR-4505     | 1.46E-06 | 0.400731172  |
| hsa-miR-5000-5p  | 1.50E-06 | -0.139696468 |
| hsa-miR-4312     | 1.50E-06 | -0.469596869 |
| hsa-miR-4637     | 1.53E-06 | 0.231903518  |
| hsa-miR-452-5p   | 1.54E-06 | 0.200528603  |
| hsa-miR-4758-3p  | 1.56E-06 | -0.415843015 |
| hsa-miR-4445-5p  | 1.57E-06 | 0.215694609  |
| hsa-miR-2114-5p  | 1.59E-06 | -0.122876875 |
| hsa-miR-3163     | 1.61E-06 | 0.116800259  |
| hsa-miR-1292     | 1.67E-06 | 0.263567244  |
| hsa-miR-10a-5p   | 1.81E-06 | -0.212930086 |
| hsa-miR-1236     | 1.81E-06 | -0.384518687 |
| hsa-miR-193b-5p  | 1.84E-06 | 0.22568324   |
| hsa-miR-409-3p   | 1.92E-06 | -0.421586389 |
| hsa-miR-3194-3p  | 1.95E-06 | -0.097815766 |
| hsa-miR-1468     | 1.95E-06 | -0.1106353   |
| hsa-miR-4258     | 2.10E-06 | -0.320526562 |
| hsa-miR-184      | 2.13E-06 | 0.20557653   |
| hsa-miR-5194     | 2.15E-06 | 0.191669177  |
| hsa-miR-449b-3p  | 2.20E-06 | -0.090051243 |
| hsa-miR-625-3p   | 2.24E-06 | -0.554700646 |
| hsa-miR-5703     | 2.30E-06 | 0.282170626  |
| hsa-miR-4425     | 2.30E-06 | 0.34398923   |

|                 |          |              |
|-----------------|----------|--------------|
| hsa-miR-3160-5p | 2.32E-06 | -0.158997396 |
| hsa-miR-4327    | 2.34E-06 | 0.430130391  |
| hsa-miR-3140-5p | 2.40E-06 | -0.085664207 |
| hsa-miR-3926    | 2.43E-06 | 0.3021918    |
| hsa-miR-324-5p  | 2.46E-06 | -0.286540872 |
| hsa-miR-675-5p  | 2.48E-06 | -0.569398727 |
| hsa-miR-34a-5p  | 2.53E-06 | -0.289706177 |
| hsa-miR-365a-3p | 2.70E-06 | -0.417352262 |
| hsa-miR-342-3p  | 2.85E-06 | -0.237557441 |
| hsa-miR-298     | 2.98E-06 | -0.354007645 |
| hsa-miR-1324    | 3.06E-06 | -0.095130881 |
| hsa-miR-3118    | 3.12E-06 | -0.102755992 |
| hsa-miR-4275    | 3.19E-06 | -0.117601334 |
| hsa-miR-4677-5p | 3.22E-06 | -0.182426967 |
| hsa-miR-5587-3p | 3.26E-06 | -0.356567178 |
| hsa-miR-3662    | 3.30E-06 | 0.101001805  |
| hsa-miR-1247-5p | 3.30E-06 | -0.344648643 |
| hsa-miR-3646    | 3.51E-06 | 0.197992651  |
| hsa-miR-659-5p  | 3.53E-06 | 0.12311587   |
| hsa-miR-1322    | 3.70E-06 | 0.088120628  |
| hsa-miR-551a    | 3.79E-06 | 0.214832043  |
| hsa-miR-4313    | 3.79E-06 | -0.421947447 |
| hsa-miR-3126-5p | 3.81E-06 | 0.205437325  |
| hsa-miR-4651    | 3.85E-06 | 0.382555937  |
| hsa-miR-3130-5p | 4.08E-06 | -0.151531633 |
| hsa-miR-526a    | 4.23E-06 | -0.226777462 |
| hsa-miR-615-5p  | 4.29E-06 | -0.232625142 |
| hsa-miR-4417    | 4.29E-06 | 0.279602743  |
| hsa-miR-934     | 4.29E-06 | 0.371360298  |
| hsa-miR-154-5p  | 4.35E-06 | -0.124820006 |
| hsa-miR-632     | 4.37E-06 | 0.085885406  |
| hsa-miR-1287    | 4.37E-06 | 0.136323138  |
| hsa-miR-206     | 4.37E-06 | 0.140728581  |
| hsa-miR-4731-3p | 4.37E-06 | -0.449517326 |
| hsa-miR-633     | 4.46E-06 | -0.137291153 |
| hsa-miR-3129-3p | 4.53E-06 | -0.129875804 |
| hsa-miR-628-3p  | 4.71E-06 | 0.136487461  |
| hsa-miR-1299    | 4.75E-06 | 0.313028925  |
| hsa-miR-584-3p  | 4.78E-06 | 0.112168624  |
| hsa-miR-3144-5p | 4.79E-06 | 0.162430441  |
| hsa-miR-4284    | 4.79E-06 | -0.448196268 |
| hsa-miR-4768-3p | 4.88E-06 | 0.125436797  |
| hsa-miR-4703-5p | 5.47E-06 | -0.148813485 |
| hsa-miR-5193    | 5.52E-06 | 0.171690429  |
| hsa-miR-1268a   | 5.62E-06 | 0.279638522  |

|                  |          |              |
|------------------|----------|--------------|
| hsa-miR-3680-3p  | 5.85E-06 | 0.102466742  |
| hsa-miR-4659a-3p | 5.88E-06 | 0.136222164  |
| hsa-miR-3174     | 6.34E-06 | 0.321771855  |
| hsa-miR-3622a-3p | 6.96E-06 | -0.09788673  |
| hsa-miR-4754     | 7.12E-06 | 0.107941313  |
| hsa-miR-3182     | 7.34E-06 | -0.13461634  |
| hsa-miR-2116-5p  | 7.45E-06 | -0.119304614 |
| hsa-miR-5683     | 7.69E-06 | -0.119411894 |
| hsa-miR-4281     | 7.75E-06 | 0.310080347  |
| hsa-miR-597      | 7.94E-06 | 0.1428639    |
| hsa-miR-26a-2-3p | 7.94E-06 | -0.176565203 |
| hsa-miR-4428     | 8.19E-06 | 0.513302432  |
| hsa-miR-517-5p   | 8.47E-06 | -0.10265993  |
| hsa-miR-299-3p   | 8.69E-06 | -0.131392947 |
| hsa-miR-296-3p   | 8.69E-06 | -0.217253928 |
| hsa-miR-3187-5p  | 9.14E-06 | 0.165013528  |
| hsa-miR-3606     | 9.36E-06 | -0.096463988 |
| hsa-miR-519b-5p  | 9.50E-06 | -0.235310338 |
| hsa-miR-5088     | 9.91E-06 | 0.166844353  |
| hsa-miR-4715-3p  | 9.99E-06 | -0.136474208 |
| hsa-miR-431-3p   | 1.03E-05 | 0.246509629  |
| hsa-miR-1304-3p  | 1.03E-05 | -0.540362054 |
| hsa-miR-3664-3p  | 1.05E-05 | 0.100958282  |
| hsa-miR-518d-3p  | 1.05E-05 | -0.188017544 |
| hsa-miR-3663-5p  | 1.12E-05 | 0.126281602  |
| hsa-miR-636      | 1.12E-05 | -0.240310464 |
| hsa-miR-5001-5p  | 1.12E-05 | 0.2692002    |
| hsa-miR-601      | 1.12E-05 | 0.28461213   |
| hsa-miR-3190-3p  | 1.12E-05 | 0.330285052  |
| hsa-miR-1321     | 1.19E-05 | 0.240985042  |
| hsa-miR-4641     | 1.22E-05 | -0.105772208 |
| hsa-miR-518f-3p  | 1.24E-05 | -0.138244076 |
| hsa-miR-223-3p   | 1.24E-05 | -0.399265312 |
| hsa-miR-1267     | 1.25E-05 | -0.432121002 |
| hsa-miR-5590-5p  | 1.26E-05 | -0.116909304 |
| hsa-miR-140-3p   | 1.31E-05 | -0.211956683 |
| hsa-miR-4662a-5p | 1.44E-05 | -0.101526117 |
| hsa-let-7i-5p    | 1.44E-05 | -0.414069687 |
| hsa-miR-548v     | 1.45E-05 | -0.103894235 |
| hsa-miR-1293     | 1.45E-05 | 0.195986369  |
| hsa-miR-589-5p   | 1.52E-05 | 0.130252884  |
| hsa-miR-3141     | 1.57E-05 | 0.299108162  |
| hsa-miR-4639-3p  | 1.58E-05 | 0.151391271  |
| hsa-miR-26b-5p   | 1.63E-05 | -0.275425683 |
| hsa-miR-4503     | 1.64E-05 | 0.096692869  |

|                    |          |              |
|--------------------|----------|--------------|
| hsa-miR-3915       | 1.66E-05 | -0.252487111 |
| hsa-miR-3121-5p    | 1.67E-05 | -0.289018675 |
| hsa-miR-4999-5p    | 1.70E-05 | 0.386389532  |
| hsa-miR-4673       | 1.73E-05 | 0.204638534  |
| hsa-miR-4652-3p    | 1.73E-05 | -0.372782933 |
| hsa-miR-4695-5p    | 1.75E-05 | 0.262797017  |
| hsa-miR-4303       | 1.76E-05 | 0.162039877  |
| hsa-miR-492        | 1.79E-05 | 0.167125549  |
| hsa-miR-3115       | 1.81E-05 | -0.10457127  |
| hsa-miR-4767       | 1.81E-05 | -0.146554122 |
| hsa-miR-4270       | 1.81E-05 | 0.326144959  |
| hsa-miR-4310       | 1.81E-05 | -0.333294895 |
| hsa-miR-1537       | 1.82E-05 | -0.100848282 |
| hsa-miR-106b-3p    | 1.91E-05 | -0.13335186  |
| hsa-miR-4482-5p    | 1.93E-05 | 0.115726055  |
| hsa-miR-3975       | 1.95E-05 | 0.132082462  |
| hsa-miR-3668       | 1.98E-05 | -0.097450879 |
| hsa-miR-3682-5p    | 2.00E-05 | -0.107830677 |
| hsa-miR-1306-5p    | 2.00E-05 | -0.317000945 |
| hsa-miR-297        | 2.07E-05 | -0.122300357 |
| hsa-miR-1273e      | 2.19E-05 | 0.374496386  |
| hsa-miR-2681-3p    | 2.20E-05 | -0.127590541 |
| hsa-miR-361-3p     | 2.20E-05 | -0.315736677 |
| hsa-miR-4640-3p    | 2.20E-05 | -0.360666667 |
| hsa-miR-1915-3p    | 2.23E-05 | 0.284018567  |
| hsa-miR-1253       | 2.30E-05 | 0.084046489  |
| hsa-miR-4510       | 2.33E-05 | -0.145350476 |
| hsa-miR-4725-5p    | 2.33E-05 | -0.213710878 |
| hsa-miR-4676-5p    | 2.43E-05 | 0.099229864  |
| hsa-miR-4259       | 2.51E-05 | 0.145431897  |
| hsa-miR-378g       | 2.52E-05 | 0.09429993   |
| hsa-miR-103a-2-5p  | 2.80E-05 | 0.086641627  |
| hsa-miR-371b-5p    | 2.80E-05 | 0.348965979  |
| hsa-miR-1911-5p    | 2.99E-05 | -0.083054394 |
| hsa-miR-5586-5p    | 2.99E-05 | -0.099360565 |
| hsa-miR-4777-5p    | 2.99E-05 | -0.110780954 |
| hsa-miR-487b       | 2.99E-05 | 0.156341336  |
| hsa-miR-4488       | 2.99E-05 | -0.36022786  |
| hsa-miR-3193       | 3.07E-05 | 0.123812503  |
| hsa-miR-3942-5p    | 3.09E-05 | -0.088259032 |
| hsa-miR-1255b-2-3p | 3.09E-05 | -0.119949502 |
| hsa-miR-1225-5p    | 3.10E-05 | 0.324981295  |
| hsa-miR-627        | 3.12E-05 | 0.140059923  |
| hsa-miR-199a-5p    | 3.31E-05 | -0.300686275 |
| hsa-miR-33a-3p     | 3.56E-05 | -0.128239665 |

|                 |          |              |
|-----------------|----------|--------------|
| hsa-miR-877-3p  | 3.70E-05 | -0.16151426  |
| hsa-miR-4271    | 3.73E-05 | 0.288318143  |
| hsa-miR-3661    | 3.75E-05 | 0.119743402  |
| hsa-miR-4498    | 3.83E-05 | 0.418591243  |
| hsa-let-7b-3p   | 3.90E-05 | -0.259092842 |
| hsa-miR-2467-5p | 4.13E-05 | -0.119800612 |
| hsa-miR-29a-3p  | 4.23E-05 | -0.472916758 |
| hsa-miR-4747-3p | 4.61E-05 | -0.259633737 |
| hsa-miR-451a    | 4.67E-05 | -0.614871769 |
| hsa-miR-4532    | 4.74E-05 | -0.216719593 |
| hsa-miR-548c-3p | 4.89E-05 | -0.131214664 |
| hsa-miR-1271-3p | 4.92E-05 | 0.100535645  |
| hsa-miR-202-5p  | 5.06E-05 | -0.114361248 |
| hsa-miR-4451    | 5.29E-05 | 0.193879165  |
| hsa-miR-583     | 5.29E-05 | -0.227382989 |
| hsa-miR-5692a   | 5.36E-05 | -0.12298318  |
| hsa-miR-186-5p  | 5.55E-05 | -0.078590473 |
| hsa-miR-4639-5p | 5.74E-05 | 0.272996015  |
| hsa-miR-5586-3p | 5.78E-05 | -0.065428125 |
| hsa-miR-150-5p  | 5.86E-05 | -0.197473854 |
| hsa-miR-3923    | 5.96E-05 | 0.083362306  |
| hsa-miR-3681-5p | 6.00E-05 | 0.080473518  |
| hsa-miR-22-3p   | 6.01E-05 | -0.464030232 |
| hsa-miR-671-5p  | 6.15E-05 | -0.308963725 |
| hsa-miR-1269a   | 6.29E-05 | -0.101148928 |
| hsa-miR-449b-5p | 6.49E-05 | -0.104673154 |
| hsa-miR-3154    | 6.54E-05 | 0.265089595  |
| hsa-miR-3675-3p | 6.85E-05 | -0.360014526 |
| hsa-miR-3156-5p | 6.89E-05 | 0.291325048  |
| hsa-miR-608     | 6.95E-05 | -0.142690783 |
| hsa-miR-2278    | 7.22E-05 | -0.095672887 |
| hsa-miR-603     | 7.43E-05 | -0.088455172 |
| hsa-miR-3183    | 7.45E-05 | -0.068437177 |
| hsa-miR-4796-5p | 7.58E-05 | 0.120011321  |
| hsa-miR-371b-3p | 7.60E-05 | -0.430976855 |
| hsa-miR-150-3p  | 7.73E-05 | 0.148852278  |
| hsa-miR-514a-5p | 7.79E-05 | -0.080191487 |
| hsa-miR-1271-5p | 7.79E-05 | 0.102057441  |
| hsa-miR-23c     | 7.79E-05 | -0.333043137 |
| hsa-miR-3943    | 7.94E-05 | -0.30856233  |
| hsa-miR-4772-3p | 8.27E-05 | -0.146081221 |
| hsa-miR-615-3p  | 8.32E-05 | -0.264757784 |
| hsa-miR-644b-3p | 8.43E-05 | 0.168367633  |
| hsa-miR-4492    | 8.50E-05 | -0.219875089 |
| hsa-miR-4472    | 8.72E-05 | -0.292769646 |



|                  |          |              |
|------------------|----------|--------------|
| hsa-miR-338-5p   | 8.84E-05 | 0.110912564  |
| hsa-miR-5571-5p  | 8.89E-05 | -0.34901175  |
| hsa-miR-4436b-3p | 8.98E-05 | 0.218379555  |
| hsa-miR-3652     | 9.41E-05 | 0.258458668  |
| hsa-miR-3177-5p  | 9.63E-05 | 0.082444415  |
| hsa-miR-4289     | 9.78E-05 | 0.079808312  |
| hsa-miR-3155a    | 9.82E-05 | 0.106530626  |
| hsa-miR-3545-5p  | 9.87E-05 | -0.082314082 |
| hsa-miR-4253     | 9.96E-05 | 0.152067916  |
